# Tapered-cuff Endotracheal Tube Does Not Prevent Early Postoperative Pneumonia Compared with Spherical-cuff Endotracheal Tube after Major Vascular Surgery

## A Randomized Controlled Trial

Antoine Monsel, M.D., M.Sc., Qin Lu, M.D., Ph.D., Marine Le Corre, M.D., M.Sc.,  
Hélène Brisson, M.D., M.Sc., Charlotte Arbelot, M.D., Corinne Vezinet, M.D., Marie-Hélène Fléron, M.D.,  
Christina Ibanez-Estève, M.D., Farid Zerimech, M.D., Malika Balduyck, Ph.D., Felipe Dexheimer, M.D.,  
Chunhao Wang, M.D., Olivier Langeron, M.D., Ph.D., Jean-Jacques Rouby, M.D., Ph.D.;  
the TETRIS Study Group\*

### ABSTRACT

**Background:** Patients undergoing major vascular surgery often develop postoperative pneumonia that impacts their outcomes. Conflicting data exist concerning the potential benefit of tapered-shaped cuffs on tracheal sealing. The primary objective of this study was to assess the efficiency of a polyvinyl chloride tapered-cuff endotracheal tube at reducing the postoperative pneumonia rate after major vascular surgery. Secondary objectives were to determine its impact on microaspiration, ventilator-associated pneumonia rate, and inner cuff pressure.

**Methods:** This prospective randomized controlled study included 109 patients who were randomly assigned to receive either spherical- (standard cuff) or taper-shaped (tapered cuff) endotracheal tubes inserted after anesthesia induction and then admitted to the intensive care unit after major vascular surgery. Cuff pressure was continuously recorded over 5 h. Pepsin and  $\alpha$ -amylase concentrations in tracheal aspirates were quantified on postoperative days 1 and 2. The primary outcome was the early postoperative pneumonia frequency.

**Results:** Comparing the tapered-cuff with standard-cuff group, respectively, postoperative pneumonia rates were comparable (42 vs. 44%,  $P = 0.87$ ) and the percentage (interquartile range) of cuff-pressure time with overinflation was significantly higher (16.1% [1.5 to 50] vs. 0.6% [0 to 8.3],  $P = 0.01$ ), with a 2.5-fold higher coefficient of variation (20.2 [10.6 to 29.4] vs. 7.6 [6.2 to 10.2],  $P < 0.001$ ). Although microaspiration frequencies were high, they did not differ between groups.

**Conclusion:** For major vascular surgery patients, polyvinyl chloride tapered-cuff endotracheal tubes with intermittent cuff-pressure control did not lower the early postoperative pneumonia frequency and did not prevent microaspiration. (ANESTHESIOLOGY 2016; 124:1041-52)

POSTOPERATIVE pneumonia is a nosocomial infection that occurs after surgery, at least 48 h after hospital admission in the absence of previous signs of incubation. Preexisting comorbidities (such as advanced age, diabetes, and chronic obstructive pulmonary disease), surgical incision (e.g., thoracotomy or sternotomy), intraoperative bleeding requiring massive blood transfusion, and long duration of surgery expose patients undergoing major vascular surgery to a high risk of postoperative pneumonia. The postoperative pneumonia rate after such surgery is around 20%, with a sharp increase after 48 h of mechanical ventilation that can reach 40% after major thoracic surgery.<sup>1</sup> Postoperative pneumonia is responsible for a significant economic burden<sup>1</sup> and remains a leading cause of morbidity and mortality, with associated mortality rates ranging between 15 and 45%.<sup>1-3</sup>

#### What We Already Know about This Topic

- Patients undergoing major vascular surgery are at high risk of postoperative pneumonia that impacts outcome.
- Although bench studies highlighted better tracheal sealing properties of polyvinyl chloride tapered-cuff endotracheal tubes, their clinical benefits in preventing postoperative pneumonia still need to be demonstrated.

#### What this Article Tells Us That Is New

- Polyvinyl chloride tapered-cuff endotracheal tubes did not lower the postoperative pneumonia frequency after major vascular surgery.
- Higher tapered-cuff–pressure variability and higher percentage of time with cuff overinflation were documented. The potential clinical impact of such findings warrants further evaluation.

This article is featured in “This Month in Anesthesiology,” page 1A. Supplemental Digital Content is available for this article. Direct URL citations appear in the printed text and are available in both the HTML and PDF versions of this article. Links to the digital files are provided in the HTML text of this article on the Journal’s Web site ([www.anesthesiology.org](http://www.anesthesiology.org)).

\*Members of the TETRIS Study Group are listed in the appendix.

Copyright © 2016, the American Society of Anesthesiologists, Inc. Wolters Kluwer Health, Inc. All Rights Reserved. Anesthesiology 2016; 124:1041-52

Although postoperative pneumonia often occurs within the first few days after starting mechanical ventilation, it shares common underlying mechanisms with ventilator-associated pneumonia (VAP). Colonization of oropharyngeal secretions with oral or gastric pathogens is commonly viewed as the first step toward postoperative pneumonia and/or VAP. Gravity then pulls them downward, converging toward subglottic area and then to the tracheobronchial tree. Despite implementation of the preventive bundle to thwart postoperative pneumonia and/or VAP, subglottic secretions can still leak through the microchanneled folds that rapidly spread on the surface of any high-volume, low-pressure endotracheal tube's cuff.<sup>1,4</sup> Subsequent and repetitive microaspiration of subglottic secretions, which carry a high bacterial burden into the distal airways, plays a pivotal role in postoperative pneumonia pathogenesis.<sup>1</sup>

Improving cuff design by changing the material or modifying the shape is among the strategies used to enhance its sealing properties. Bench studies showed promising results in terms of reducing air or liquid leakage across the cuff when using a new tapered-shaped cuff compared with the standard-shaped (spherical or cylindrical) cuff.<sup>5-7</sup> This new design was based on the concept that a conical shape would provide a better fit between the trachea and the cuff. Currently available data are discrepant concerning the tapered-cuff's efficiency at preventing microaspirations,<sup>8-10</sup> VAP,<sup>11</sup> and bacterial colonization of the tracheal tree<sup>12</sup> in critically ill patients. A recent, two-period, observational study did not show any VAP rate differences before and after implementing the use of tapered-cuff endotracheal tubes.<sup>11</sup> However, in that study, adherence to the VAP-prevention bundle was significantly lower during the tapered-cuff period, precluding fair comparison. On the other hand, tapered-cuff endotracheal tubes have never been evaluated in postoperative pneumonia prevention.

We designed this prospective randomized controlled study to assess the effect of tapered-cuff endotracheal tubes on the postoperative pneumonia rate and microaspiration frequency in major vascular surgery patients.

## Materials and Methods

### Study Design and Patients

This prospective, randomized controlled, single-blind study was conducted in our 26-bed multidisciplinary intensive care unit (ICU) during a 48-month period. The study was approved by the Institutional Ethics Committee *Île-de-France*

V7 (Institutional Review Board of La Pitié-Salpêtrière Hospital, Paris, France; #ID-RCB-2011-A01038-33). Because our protocol did not modify usual patient care, and the two types of endotracheal tubes were also routinely used in the operating room, the institutional review board waived signed consent. Patients and/or their relatives received written information. The study was registered with ClinicalTrials.gov (NCT01457248).

The inclusion criteria were patients older than 18 yr; who were scheduled to undergo major thoracic, thoracoabdominal, or abdominal aorta surgery without pulmonary exclusion requiring intubation with a double-lumen endotracheal tube; and justifying systematic admission to the multidisciplinary ICU for postoperative care. Patients admitted to the ICU with prior tracheostomy, already enrolled in another trial, or who had had pneumonia within 1 month before the planned surgery were excluded.

A computer-generated randomization list gave an allocation table in permuted blocks (fixed block size, 10; allocation ratio, 1:1). Treatment allocation was concealed, using sequentially numbered opaque sealed envelopes. Patients were screened according to the surgery schedule established 1 week before the intervention. Investigators recruited patients satisfying inclusion criteria and provided information on the study whenever possible before randomization. The anesthesiologist took the next assignment envelope (standard cuff or tapered cuff) in the operating room before anesthesia. Standard-cuff patients were intubated with High Contour Brandt endotracheal tube incorporating a polyvinyl chloride (PVC) spherical-shaped cuff (Mallinckrodt Medical, USA). Tapered-cuff patients were intubated with TaperGuard (Covidien, Ireland) (fig. 1). The endotracheal tube size and the insertion technique were chosen according to professional guidelines. The Cormack–Lehane score and difficult airway-management rate were recorded. Endotracheal tube cuff-pressure setup and management are described in Methods (Supplemental Digital Content 1, <http://links.lww.com/ALN/B258>). Briefly, the cuff was inflated to 25 cm H<sub>2</sub>O and manually checked with a manometer every 6 h. The different external appearances of the two tracheal tubes

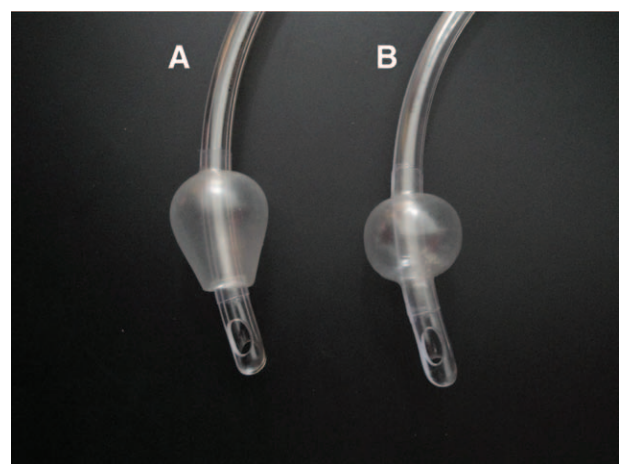

**Fig. 1.** Polyvinyl chloride endotracheal tubes used in the study: (A) tapered cuff; (B) standard (spherical) cuff.

Submitted for publication July 23, 2015. Accepted for publication January 20, 2016. From the Multidisciplinary Intensive Care Unit, Department of Anesthesiology and Critical Care, La Pitié-Salpêtrière Hospital, Assistance Publique-Hôpitaux de Paris, UPMC Université, Paris, France (A.M., Q.L., M.L.C., H.B., C.A., C.V., M.-H.F., C.I.-E., O.L., J.-J.R.); Department of Biochemistry and Molecular Biology of the Centre de Biologie Pathologie, CHRU Lille, Lille University, Faculty of Pharmacy, Lille, France (F.Z., M.B.); Department of Adult Intensive Care, Mãe de Deus Hospital and Moinhos de Vento Hospital, and Graduate Program in Respiratory Sciences, Federal University of Rio Grande do Sul, Porto Alegre, Brazil (F.D.); and Department of Medical Intensive Care Unit, Peking Union Medical College Hospital, Beijing, China (C.W.).

rendered blinding of the randomization arm to physicians and nurses impossible. Antibiotic prophylaxis (IV cefamandole; initial dose: 1.5 g, and 750 mg every 2 h) was administered intraoperatively and stopped at the end of surgery. After surgery, all patients were directly admitted to the ICU for postoperative care. They were screened daily for clinical suspicion of postoperative pneumonia for 5 days postextubation or until day 28 if the patient could not be weaned off mechanical ventilation. Tracheal aspirates were sampled within the first hour after the patient's admission (day 1) and 24 h later (day 2) for quantitative pepsin and  $\alpha$ -amylase determinations. Cuff pressure was continuously recorded during the 5 h after ICU admission.

The primary endpoint of the study was the frequency of first postoperative pneumonia episodes. The secondary endpoints were as follows: time from intubation to postoperative pneumonia diagnosis; rate of second pneumonia episodes, defined as pneumonia diagnosed after 8 days of antimicrobial treatment for the first pneumonia episode; microaspiration frequency, assessed by tracheal aspirate pepsin and  $\alpha$ -amylase concentrations; cuff-pressure variations; lengths of mechanical ventilation and ICU stay, and 28-day mortality.

### Diagnosis of Postoperative Pneumonia

Pneumonia diagnosed between intubation and the 5th day post extubation was considered the first postoperative pneumonia episode. Postoperative pneumonia was suspected based on Johanson criteria<sup>13</sup>: new or persistent infiltrates on chest radiography and/or new bedside lung-ultrasound patterns highly evocative of lung infection<sup>14</sup> (see Methods, Supplemental Digital Content 1, <http://links.lww.com/ALN/B258>), associated with two of the three following clinical features: temperature 38.4°C or greater or less than 36.5°C, leukocyte count greater than  $11 \times 10^3/\text{ml}$ , and/or purulent bronchial secretions. For mechanically ventilated patients, the postoperative pneumonia diagnosis was confirmed when Johanson criteria were associated with a significant concentration of bacteria isolated in lower respiratory tract specimens obtained by fiber-optic bronchoscopy with nonprotected bronchoalveolar lavage or protected mini-bronchoalveolar lavage.<sup>15</sup> A positive sample contained  $10^4$  or greater colony-forming units per milliliter for nonprotected bronchoalveolar lavage<sup>16</sup> and  $10^3$  or greater colony-forming units per milliliter for protected mini-bronchoalveolar lavage.<sup>17</sup> For spontaneously breathing patients meeting the Johanson criteria whose lower respiratory tract secretions could not be sampled or ventilated patients meeting those criteria whose lower respiratory tract specimens were negative, a postoperative pneumonia diagnosis was considered possible.<sup>18,19</sup> Two independent board-certified investigators (attending physicians), blinded to study-arm assignment, made the final pneumonia diagnosis, including the interpretation of chest radiographs and/or lung ultrasounds.

### Pepsin and $\alpha$ -Amylase Measurements and Cuff-pressure Recording

On day 1, immediately after surgery, and on mechanical ventilation day 2, pepsin and  $\alpha$ -amylase in tracheal aspirates

were measured quantitatively with enzyme-linked immunosorbent assays (Biochemistry and Molecular Biology Laboratory, CHRU, Lille, France). Processing method of tracheal aspirate samples and pepsin and  $\alpha$ -amylase quantification techniques were described previously (see Methods, Supplemental Digital Content 1, <http://links.lww.com/ALN/B258>).<sup>20</sup> Concentrations of pepsin greater than 200 ng/ml<sup>21</sup> and  $\alpha$ -amylase greater than 1,685  $\mu\text{g/l}$  defined abundant microaspiration.<sup>20,22,23</sup> Biochemists who measured pepsin concentrations were blinded to study-group assignment.

During the first 5 h after ICU admission, maximum ( $P_{\text{max}}$ ), minimum ( $P_{\text{min}}$ ), and mean ( $P_{\text{mean}}$ ) cuff pressures were digitally recorded continuously at 100 Hz, with Physiotrace software (Centre d'Investigation Clinique-Innovation Technologique, Centre Hospitalo-Universitaire, France). Cuff pressures were defined as normal (20 to 30 cm H<sub>2</sub>O), underinflated (less than 20 cm H<sub>2</sub>O), or overinflated (greater than 30 cm H<sub>2</sub>O).  $P_{\text{max}}$ ,  $P_{\text{min}}$ , and  $P_{\text{mean}}$  cuff pressures and the time in each pressure zone were recorded. The coefficient of cuff-pressure variation was calculated as follows:  $[(P_{\text{max}} - P_{\text{mean}}) + (P_{\text{mean}} - P_{\text{min}})]/2$ .<sup>9</sup>

### Concomitant VAP-prevention Strategies

In the ICU, VAP-prevention strategies were routinely applied to both groups of patients. The measures included the following: cuff pressure measured every 6 h using a manual manometer (Ambu Cuff Pressure Gauge; Ambu A/S, Denmark) and maintained between 20 and 30 cm H<sub>2</sub>O; semirecumbent body position maintained between 30° and 45°; enteral nutrition with quantification of residual gastric volume every 6 h; stress-ulcer prevention with a proton-pump inhibitor; and oral decontamination with hexetidine every 6 h. All patients were mechanically ventilated with tidal volume of 6 ml/kg of ideal body weight.<sup>24</sup> The end-expiratory-pressure level was set by the patient's treating physician.

### Statistical Analyses

The primary outcome analysis evaluated the first postoperative pneumonia episode frequencies for "tapered-cuff" patients versus "standard-cuff" patients. The postoperative pneumonia rate after major vascular surgery in our ICU was 48% for patients intubated with standard-cuff endotracheal tubes in 2010. We estimated that, with a 5% risk and 80% statistical power, 112 patients (56 in each group) would be needed to detect a 50% reduction of pneumonia frequency in the tapered-cuff group compared with the standard-cuff group, based on previously published data.<sup>11,25-30</sup> The primary endpoint analysis was performed on the per-protocol population, defined as randomized patients who were admitted to the ICU immediately after surgery. Patients who were randomized before surgery but transferred to another ward or another ICU outside the study center on day 1 after the intervention were considered lost-to-follow-up early; they were excluded from the analysis.

Categorical variables are expressed as numbers (%) and continuous variables as medians (25 to 75% interquartile range). A two-tailed hypothesis was tested. Differences between

standard-cuff and tapered-cuff groups for patients' characteristics, perioperative factors, primary and secondary outcome measures, inner cuff pressures, and pepsin and  $\alpha$ -amylase concentrations were compared using chi-square, Fisher exact, or Mann–Whitney rank sum test, as appropriate. Relative risk and its 95% CI were calculated for the primary outcome. The cumulative rates of patients remaining postoperative pneumonia-free from enrollment to day 28 were analyzed with the Kaplan–Meier method and compared between groups using a log-rank test. Statistical analyses were computed with SPSS v13.0 (SPSS, USA) and SigmaStat v3.5 (SystatS, USA). A  $P$  value of less than 0.05 defined significance.

## Results

### Patients

Among 123 patients undergoing planned major vascular surgery screened for inclusion from October 2011 to September 2013, 114 patients were randomized: 58 assigned to the standard-cuff group and 56 allocated to the tapered-cuff group. Five patients were secondarily excluded from the study within 1 day after surgery (fig. 2), leaving 57 and 52 patients to be analyzed in the standard- and tapered-cuff groups, respectively. Their clinical characteristics at ICU admission are reported in table 1. Other than positive end-expiratory pressure (PEEP), which was higher for the tapered-cuff group, intra- and postoperative risk factors for postoperative pneumonia were comparable for the two groups (table 2).

### Postoperative Pneumonia

As shown in table 3, first postoperative pneumonia frequencies did not differ between standard- and tapered-cuff groups (44 vs. 42%,  $P = 0.87$ , relative risk = 0.97; 95% CI, 0.70

to 1.35). Sixteen standard-cuff patients and 15 tapered-cuff patients had microbiologically confirmed postoperative pneumonia (table 4). Nine standard-cuff patients and seven tapered-cuff patients had possible postoperative pneumonia. The cumulative rate of patients remaining postoperative pneumonia-free from enrollment to day 28 did not differ between groups ( $P = 0.71$ ; fig. 3). As shown in tables 3 and 4, clinical and bacterial postoperative pneumonia characteristics and outcome data were comparable for the two groups.

### Tracheal Pepsin, $\alpha$ -Amylase, and Inner Cuff Pressure

Tracheal aspirate pepsin levels exceeded 200 ng/ml in 23% of standard-cuff patients and in 20% of tapered-cuff patients ( $P = 0.51$ ) at ICU admission (day 1) (fig. 4). On day 2, the percentage of patients with pepsin concentration greater than 200 ng/ml remained unchanged for the tapered-cuff group (19%), while it increased, *albeit* not significantly, to 35% for the standard-cuff group ( $P = 0.11$ ). Using the previously validated cutoff of 1,685  $\mu$ g/l, tracheal aspirate  $\alpha$ -amylase concentrations showed that 37 and 52% of the patients had significant oropharyngeal microaspirations on days 1 and 2, respectively. No significant between-group differences were found for microaspiration rates and absolute  $\alpha$ -amylase values on postoperative days 1 and 2 (fig. 5).

The tapered-cuff group's  $P_{\max}$  was significantly higher and  $P_{\min}$  significantly lower than those of the standard-cuff group (table 5). Comparing the tapered-cuff group to the standard-cuff group, respectively, the coefficient of cuff-pressure variation and the time with cuff overinflation were significantly higher, the time with cuff pressure within the normal range was significantly shorter, and the time with cuff underinflation was longer, but the latter difference did not reach statistical significance ( $P = 0.06$ ). Illustrative cuff-pressure recordings are shown in figure 6.

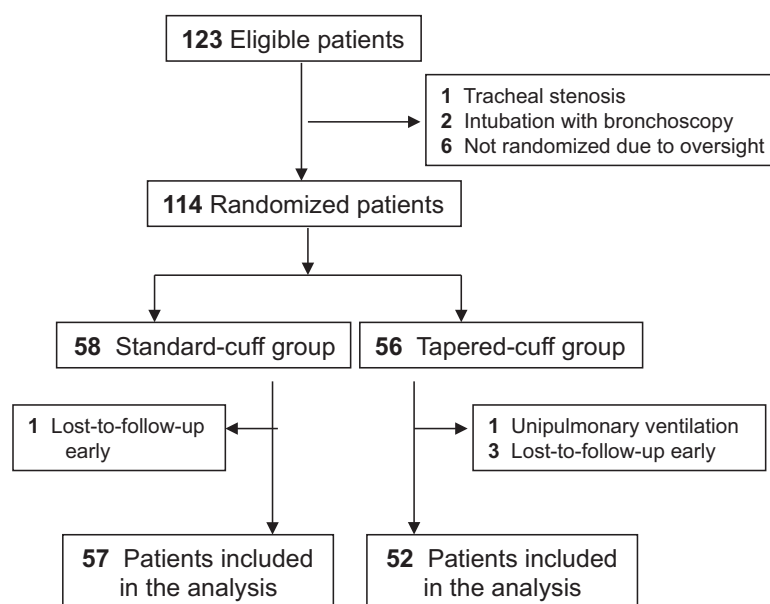

**Fig. 2.** Study flow chart. Lost-to-follow-up early was defined as patients who had been randomized in the operating room but on day 1 after surgery had been transferred to another intensive care unit or ward outside the study center.

**Table 1.** Patient Characteristics at ICU Admission According to Randomized Cuff Group

| Characteristics                               | Standard Cuff (n = 57) | Tapered Cuff (n = 52) |
|-----------------------------------------------|------------------------|-----------------------|
| Age, yr                                       | 66 (59–73)             | 64.0 (58–70)          |
| Male sex, n (%)                               | 39 (68)                | 38 (73)               |
| Body mass index                               | 24.8 (21.5–29.5)       | 24.9 (22.9–28.7)      |
| Simplified Acute Physiology Score II          | 31 (24–40)             | 29 (21–42)            |
| Sepsis-related Organ Failure Assessment score | 5 (2–8)                | 6.0 (3–8)             |
| McCabe & Jackson score                        | 1.0 (1.0–2.0)          | 1.0 (1.0–1.5)         |
| Vascular surgery category, n (%)              |                        |                       |
| Ascending aorta or aortic arch aneurysm       | 16 (28)                | 15 (29)               |
| Thoracic or thoracoabdominal aorta aneurysm   | 12 (21)                | 8 (15)                |
| Abdominal aorta aneurysm                      | 7 (12)                 | 4 (8)                 |
| Aortic dissection                             | 1 (2)                  | 1 (2)                 |
| Vascular prosthesis infection                 | 7 (12)                 | 9 (17)                |
| Other                                         | 14 (25)                | 15 (29)               |
| Shock at ICU admission, n (%)                 | 27 (47)                | 20 (38)               |
| Diabetes, n (%)                               | 7 (12)                 | 9 (17)                |
| Chronic obstructive pulmonary disease, n (%)  | 20 (35)                | 18 (35)               |
| Immunodeficiency, n (%)                       | 5 (9)                  | 8 (15)                |

Values are expressed as median (25–75% interquartile range) or number (%).  
ICU = intensive care unit.

**Table 2.** Risk Factors for Postoperative Pneumonia According to Randomized Cuff Group

| Factors                                   | Standard Cuff (n = 57) | Tapered Cuff (n = 52) | P Value |
|-------------------------------------------|------------------------|-----------------------|---------|
| <b>Intraoperative</b>                     |                        |                       |         |
| Surgical approach, n (%)                  |                        |                       | 0.88    |
| Sternotomy                                | 22 (39)                | 22 (42)               |         |
| Thoracotomy or thoracotomy                | 5 (9)                  | 5 (10)                |         |
| Laparotomy or sternolaparotomy            | 27 (47)                | 21 (40)               |         |
| Lumbar incision                           | 3 (5)                  | 4 (8)                 |         |
| Duration of surgery (h)                   | 5.0 (3.7–6.5)          | 4.5 (3.8–6.0)         | 0.66    |
| Blood transfusion (units)                 | 4 (2–9)                | 4 (2–6)               | 0.15    |
| Fluid loading, ml                         | 4,000 (3,500–5,000)    | 4,000 (3,000–5,000)   | 0.51    |
| Cardiopulmonary bypass, n (%)             | 21 (37)                | 16 (31)               | 0.55    |
| Circulatory arrest, n (%)                 | 6 (11)                 | 7 (13)                | 0.7     |
| Cardiopulmonary bypass duration, min      | 158 (126–181)          | 125 (94–167)          | 0.13    |
| TEE, n (%)                                | 30 (53)                | 26 (50)               | 0.85    |
| Intraoperative prophylactic antibiotics   | 56 (98)                | 49 (94)               | 0.30    |
| Endotracheal tube size (mm)               | 7.5 (7.5–8)            | 7.5 (7.5–8)           | 0.73    |
| Cormack–Lehane score                      |                        |                       | 0.40    |
| 1                                         | 49/56 (88)             | 40/51 (78)            |         |
| 2                                         | 4/56 (7)               | 9/51 (18)             |         |
| 3                                         | 1/56 (2)               | 1/51 (2)              |         |
| 4                                         | 2/56 (4)               | 1/51 (2)              |         |
| Difficult tracheal intubation             | 2/57 (4)               | 0                     | 0.50    |
| Difficult bag-mask ventilation            | 1/57 (2)               | 2/51 (4)              | 0.60    |
| <b>Postoperative</b>                      |                        |                       |         |
| PEEP (cm H <sub>2</sub> O)                | 5.0 (5.0–6.0)          | 5.6 (5.0–6.3)         | 0.03*   |
| Muscle relaxant used, n (%)               | 5 (9)                  | 5 (10)                | 0.58    |
| Proton-pump inhibitor used, n (%)         | 52 (91)                | 49 (94)               | 0.62    |
| Nasogastric tube, n (%)                   | 52 (91)                | 48 (92)               | 0.87    |
| Residual gastric volume, ml/day           | 97 (5–177)             | 48 (1–132)            | 0.32    |
| Enteral nutrition (days)                  | 0 (0–1)                | 0 (0–2)               | 0.24    |
| Patients with trunk position < 30°, n (%) | 21 (37)                | 18 (35)               | 0.91    |
| Postoperative antibiotics, n (%)          | 1 (2)                  | 3 (6)                 | 0.35    |

Data are expressed as median and 25–75% interquartile range or number (%).

\**P* < 0.05.

PEEP = positive end-expiratory pressure; TEE = transesophageal echocardiography.

**Table 3.** Clinical Postoperative Pneumonia Characteristics and Outcome Data According to Randomized Cuff Group

| Characteristics                                        | Standard Cuff (n = 57) | Tapered Cuff (n = 52) | P Value |
|--------------------------------------------------------|------------------------|-----------------------|---------|
| First postoperative pneumonia episodes, n (%)          | 25 (44)                | 22 (42)               | 0.87    |
| Day(s) until the first postoperative pneumonia episode | 3 (2–5)                | 4 (2–6)               | 0.35    |
| CPIS (first postoperative pneumonia)                   | 7 (6–8)                | 7 (6–9)               | 0.83    |
| Procalcitonin (first postoperative pneumonia), ng/ml   | 4.1 (0.5–8.7)          | 1.6 (0.4–3.4)         | 0.27    |
| Second postoperative pneumonia episodes, n (%)         | 8 (14)                 | 10 (19)               | 0.47    |
| Days until the second postoperative pneumonia episode  | 9 (8–19)               | 10 (7–25)             | 0.83    |
| Duration of mechanical ventilation, h                  | 29 (9–97)              | 27.5 (12–306)         | 0.46    |
| ICU length of stay, days                               | 7 (4–14)               | 9 (5–20)              | 0.21    |
| Length of hospital stay, days                          | 22 (13–30)             | 20 (12–32)            | 0.91    |
| 28-day mortality, n (%)                                | 2 (4)                  | 1 (2)                 | 1.0     |

Values are expressed as median (25–75% interquartile range) or number (%).

CPIS = Clinical Pulmonary Infection Score; ICU = intensive care unit.

**Table 4.** Microorganisms Causing Postoperative Pneumonia According to Randomized Cuff Group

| Pneumonia                                    | Standard Cuff (n = 25) | Tapered Cuff (n = 22) | P Value |
|----------------------------------------------|------------------------|-----------------------|---------|
| Microbiologically confirmed, n (%)           | 16 (64)                | 15 (68)               | 0.76    |
| Polymicrobial ( $\geq 2$ ) microorganisms, n | 4                      | 2                     |         |
| Identified microorganisms, n                 | 20                     | 17                    |         |
| Gram positive, n                             | 4                      | 3                     |         |
| <i>Staphylococcus coagulase</i> negative     | 0                      | 1                     |         |
| <i>Streptococcus</i> spp                     | 3                      | 1                     |         |
| <i>Enterococci</i> spp                       | 1                      | 1                     |         |
| Gram negative, n                             | 13                     | 10                    |         |
| <i>Enterobacteriaceae</i>                    | 9                      | 8                     |         |
| <i>Pseudomonas aeruginosa</i>                | 2                      | 1                     |         |
| <i>Acinetobacter</i> spp                     | 1                      | 0                     |         |
| <i>Stenotrophomonas</i> spp                  | 1                      | 0                     |         |
| <i>Haemophilus</i> spp                       | 0                      | 1                     |         |
| Mixed oropharyngeal flora, n                 | 3                      | 3                     |         |
| <i>Herpes simplex</i> virus 1                | 0                      | 1                     |         |
| Possible pneumonia, n (%)                    | 9 (38)                 | 7 (32)                | 0.76    |

Values are expressed as n (%). Possible pneumonia is microbiologically undocumented pneumonia, defined as patients meeting the Johanson criteria, who had a negative lower respiratory tract specimen or from whom lower respiratory tract specimen could not be obtained.

spp = species.

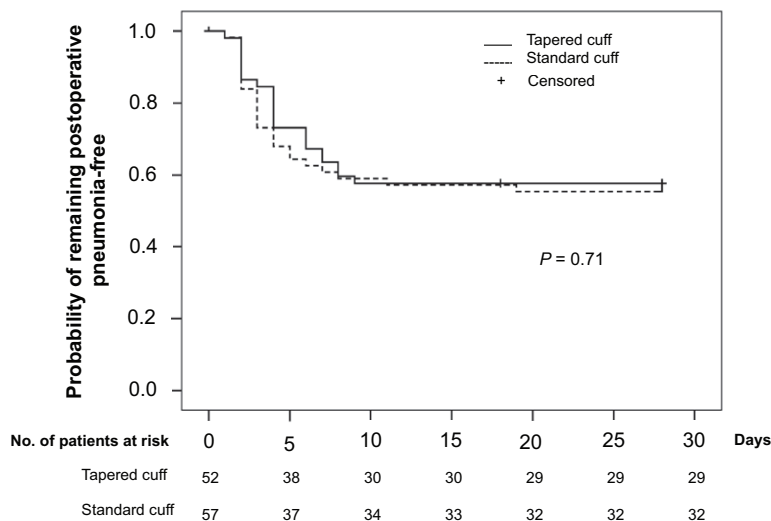

**Fig. 3.** Kaplan–Meier curve showing the probability of remaining postoperative pneumonia-free (log-rank test:  $P = 0.71$ ). +One tapered-cuff patient censored before day 28 because of tracheostomy performed on day 18.

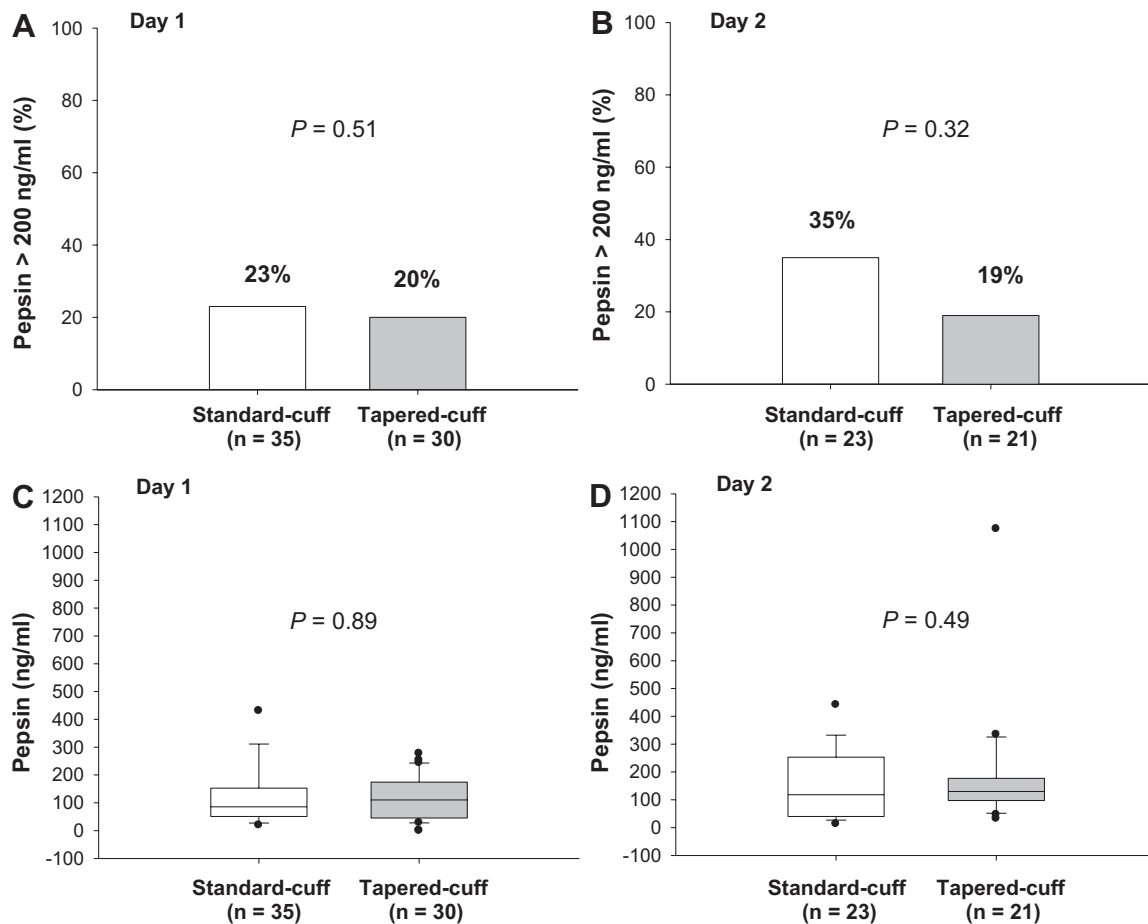

**Fig. 4.** Pepsin concentrations measured in the tracheal aspirates of standard-cuff and tapered-cuff patients. (A and B) Percentages of patients whose pepsin levels were greater than 200 ng/ml at admission (day 1) and 24 h later (day 2). (C and D) Box plots of pepsin levels on days 1 and 2, respectively: internal horizontal lines are the medians, lower and upper box limits are the 25 to 75% interquartile range, respectively, T-bars represent the ranges, and • are outliers.

## Discussion

The results of this study showed that using tapered-cuff endotracheal tubes in major vascular surgery patients did not prevent the first postoperative pneumonia episode, failed to prevent intraoperative gastric or oropharyngeal microaspiration, generated higher variability of cuff inner pressure, increased the time with cuff overinflation, and decreased the time with normal cuff pressure.

### Rationale for Using a Tapered-cuff Endotracheal Tube

The rationale for designing a tapered-shaped cuff was based on the assumption that a continuum of minimum-to-maximum diameter sections might better fit the tracheal walls than a standard cuff with single fixed diameter. Improving the fit between trachea and cuff walls would expand the surface area with few or no folds, thereby reducing the number of microchannels toward distal airspace, which might ultimately result in improved tracheal sealing.

Bench-study findings comparing a tapered cuff to either spherical- or cylindrical-shaped cuffs highlighted better sealing properties in terms of liquid and gas leakages.<sup>6,7</sup> However,

obvious methodological limitations of such *in vitro* studies preclude any generalization of their observations to clinical settings. In addition, when polyurethane tapered cuffs were tested in similar settings, the tapered cuff's superiority was not confirmed.<sup>6,7</sup> Perioperative sealing properties of tapered cuffs were assessed in a clinical study conducted on patients in a prone position for lumbar surgery. D'Haese *et al.*<sup>8</sup> used bronchoscopic examination to assess colored-dye leakage across the cuff. Although their results suggested significantly less tracheal aspiration of the dye with tapered-cuff endotracheal tubes, some methodological limitations should be noted. Prone positioning can increase the risk of gastric content aspiration and impact the determinants of tracheal sealing, and evaluations concerned short 10- to 120-min periods. Aspiration was diagnosed based on bronchoscopic detection of liquid-dye-volume leakage, as its viscosity is much lower than that of oropharyngeal secretions.

The first postoperative pneumonia episode after major aorta surgery is thought to be most closely related to intraoperative risk factors for microaspiration, potentially prevented by improving perioperative tracheal sealing. In contrast, the second episode is

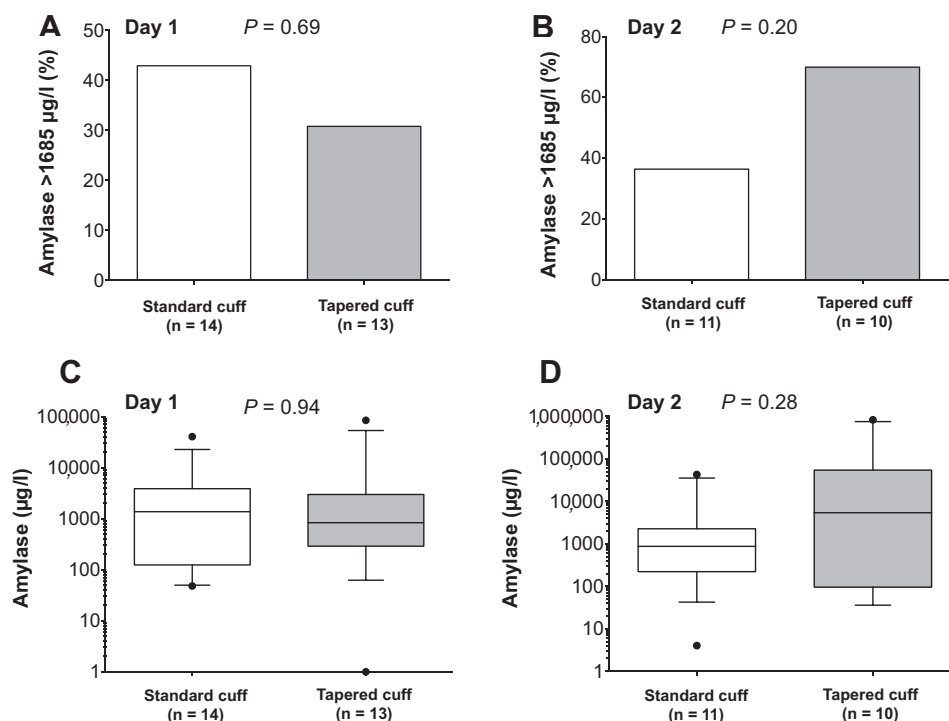

**Fig. 5.**  $\alpha$ -Amylase concentrations measured in the tracheal aspirates of standard-cuff and tapered-cuff patients. (A and B) Percentages of patients whose  $\alpha$ -amylase levels were greater than 1,685  $\mu\text{g}/\text{ml}$  at admission (day 1) and 24 h later (day 2), respectively. (C and D) Box plots of  $\alpha$ -amylase levels on days 1 and 2, respectively: internal horizontal lines are the medians, lower and upper box limits are the 25 to 75% interquartile range, respectively, T-bars represent the ranges, and • are outliers.

**Table 5.** Inner Cuff-pressure-monitoring Characteristics According to Randomized Cuff Group

| Characteristics                         | Standard Cuff (n = 32) | Tapered Cuff (n = 44) | P Value |
|-----------------------------------------|------------------------|-----------------------|---------|
| Duration of acquisition, h              | 5.0 (3.4–6.1)          | 5.0 (4.0–6.6)         | 0.51    |
| Cuff pressure, cm H <sub>2</sub> O      |                        |                       |         |
| Mean                                    | 26 (23–28)             | 25 (22–30)            | 0.97    |
| Maximum                                 | 43 (36–48)             | 65 (45–98)            | < 0.001 |
| Minimum                                 | 23 (18–25)             | 18 (15–22)            | 0.016   |
| Cuff pressure, % of time                |                        |                       |         |
| Normal, 20–30 cm H <sub>2</sub> O       | 97.1 (73.5–99.9)       | 68.4 (41.5–80.4)      | < 0.001 |
| Underinflated, < 20 cm H <sub>2</sub> O | 0 (0–0)                | 0 (0–18.5)            | 0.057   |
| Overinflated, > 30 cm H <sub>2</sub> O  | 0.6 (0–8.3)            | 16.1 (1.5–50)         | 0.001   |
| Coefficient of cuff-pressure variation  | 7.6 (6.2–10.2)         | 20.2 (10.6–29.4)      | < 0.001 |

Values are expressed as median (25–75% interquartile range).

mostly associated with prolonged invasive mechanical ventilation and other factors leading to VAP and/or hospital-acquired pneumonia, which are more independent of intraoperative events. For this study, we considered the first postoperative pneumonia episode, diagnosed between intubation and day-5 postextubation, to be mainly attributable to intraoperative microaspiration events. In contrast, because pneumonia developing after day-5 postextubation could reflect other factors driving late hospital-acquired pneumonia rather than endotracheal tube and microaspiration events, its episodes were not considered herein. All patients remaining pneumonia-free 5 days postextubation were discharged from the ICU but were followed until day 28; none was readmitted to the ICU for pneumonia.

This randomized, controlled trial investigating the potential advantage of PVC tapered-cuff endotracheal tubes to prevent the first postoperative pneumonia episode was conducted on patients undergoing major vascular surgery because this population carries a high risk of postoperative lung infection. Although initially subjected to short-term ventilation for surgery,<sup>31</sup> these patients were exposed intraoperatively to numerous risk factors for microaspiration (e.g., surgery duration, body position, and transesophageal echocardiography) that might have been prevented by intraoperative use of a tapered-cuff endotracheal tube.<sup>1</sup> Moreover, patient-related factors (age, chronic obstructive pulmonary disease, diabetes, and immunodeficiency) increase the risk of developing postoperative pneumonia. As expected,



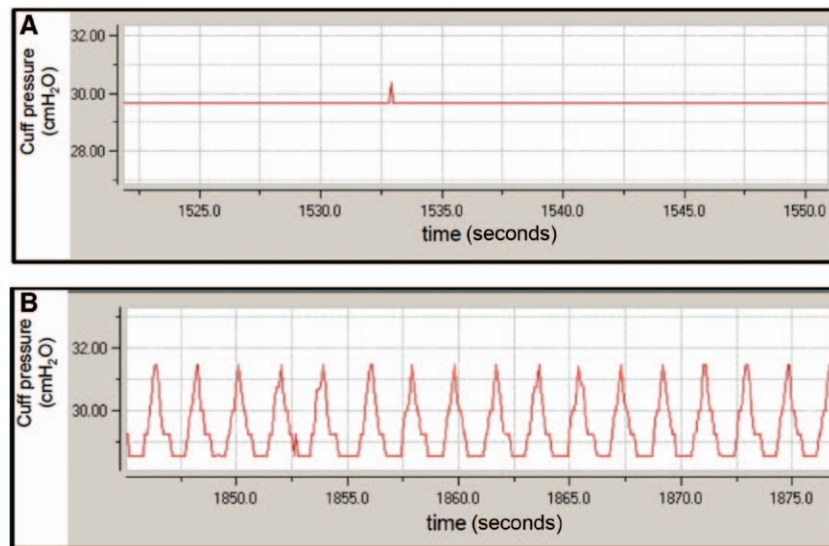

**Fig. 6.** Representative cuff-pressure recordings of a (A) standard (spherical) cuff or (B) tapered cuff during mechanical ventilation. Tapered-cuff pressures varied more widely.

around 40% of patients developed early postoperative pneumonia. Similar postoperative pneumonia rates, ranging from 30 to 48%, were reported after cardiothoracic surgery.<sup>32–37</sup> Among patients meeting Johanson criteria, 66% had microbiologically confirmed pneumonia and 34% had possible pneumonia. The negative respiratory samples of 9 of the 16 patients with possible pneumonia could reflect antibiotic use (intraoperative prophylaxis or aorta-prosthesis–related sepsis) before specimen collection. However, intraoperative antibiotic use did not differ significantly between the two study groups.

Unfortunately, our results showed that tapered-cuff endotracheal tubes did not prevent early postoperative pneumonia. Similarly, two recent prospective studies showed that the use of tapered-cuff endotracheal tubes did not lower the VAP rate for critically ill patients intubated for various causes of respiratory failure.<sup>11,12</sup> The inability to prevent VAP likely reflects the inability to prevent intraoperative microaspiration during major vascular surgery. Last, tapered-cuff endotracheal tubes cannot reduce the risk factors resulting from comorbidities, elevated disease severity scores, and massive blood transfusion, all frequently observed in patients undergoing major vascular surgery.

Our microaspiration results agree with those of two randomized controlled trials that enrolled medical ICU patients and showed that tracheal aspirate pepsin levels did not differ between tapered- and cylindrical-cuff groups.<sup>9,10</sup> However, those studies used polyurethane cuffs, which could explain the lack of benefit of cuff shape on sealing properties, as reported in *in vitro* studies.<sup>6,7</sup> To the best of our knowledge, tracheal sealing properties of PVC tapered cuffs have never been assessed through tracheal pepsin or  $\alpha$ -amylase level measurements. Because pepsin is a gastric marker, monitoring its tracheal aspirate level might have underestimated the true oropharyngeal microaspiration frequency. Therefore, we also measured tracheal  $\alpha$ -amylase, an oropharyngeal marker, which confirmed

that overall (oropharyngeal and gastric) microaspiration events did not differ between standard- and tapered-cuff groups.

Another factor that might explain the failure to prevent postoperative pneumonia is the significantly higher coefficient of cuff-pressure variation with the tapered-cuff, compared with the standard cuff (table 5). As shown in a bench study,<sup>38</sup> tapered cuffs had the lowest tracheal wall contact area compared with other-shaped cuffs. This small contact area might lead to cuff slippage and, hence, to cuff-pressure fluctuation over time. As a consequence, the times with cuff overinflation and underinflation were longer for the tapered-cuff group. These effects are potentially detrimental: cuff underinflation–induced microaspiration might enhance the risk of postoperative pneumonia, whereas cuff overinflation might produce trachea-wall ischemia.<sup>39</sup> Although no adverse effects (*e.g.*, postextubation stridor or tracheal stenosis) were observed herein, our findings suggest that close monitoring and continuous cuff-pressure control would be required if tapered-cuff endotracheal tubes were to be used.

### Methodological Limitations of the Study

The current study has some limitations. First, the cuff material might impact its tracheal sealing properties. Although two bench studies found that polyurethane tapered cuffs had no benefits for microaspiration reduction, their preventive role in postoperative pneumonia remains to be investigated further. Second, in many previously published studies, the control group was composed of patients intubated with cylindrical-cuff endotracheal tubes.<sup>9,11,12</sup> Our control patients were intubated with standard (spherical)-cuff endotracheal tubes. Given that PVC spherical-cuff endotracheal tubes are used worldwide, with proven good performances,<sup>40–44</sup> and are routinely used in our surgical center as standard practice for patients undergoing major vascular surgery, we considered that such control group management would not introduce bias into our trial. Third, although statistically significant

(5 vs. 5.6 cm H<sub>2</sub>O,  $P = 0.03$ ), the mean PEEP level difference observed between groups was much lower than that demonstrated to affect tracheal sealing.<sup>7,45</sup> For this reason, we think that such a low PEEP level difference (0.6 cm H<sub>2</sub>O) did not induce major bias into our trial. Last, the lack of continuous cuff-pressure control might have blunted the potential benefit of tapered-cuff endotracheal tubes in terms of sealing properties. Indeed, it was shown that continuous cuff-pressure control using a mechanical device reduced cuff-pressure fluctuation and the time in underinflation for a series of critically ill patients intubated with tapered- or cylindrical-cuff endotracheal tubes.<sup>10</sup> Although available data on the benefits of continuous cuff-pressure control for microaspiration events and VAP prevention are contradictory,<sup>10,21,46,47</sup> two monocenter randomized controlled trials have reported that continuous control of cuff pressure either mechanically or electronically may prevent VAP.<sup>21,47</sup> Therefore, it cannot be excluded that the better sealing properties of the tapered-cuff endotracheal tube may have been offset by intermittent cuff-pressure control. The lack of randomized controlled multicenter trial explains why, to date, no recommendations for routine use of continuous cuff-pressure control as a VAP-preventive measure have been issued.<sup>48</sup> Some caveats had been raised concerning the use of certain automated cuff-pressure controllers, leading to worse tracheal sealing and potentially cause trachea-wall injury.<sup>49</sup> Additional studies are required to assess the impact of continuous cuff-pressure control on efficiency of tapered- and spherical-cuff endotracheal tubes to prevent gastric aspiration and postoperative pneumonia.

In conclusion, our results did not show that PVC tapered-cuff endotracheal tubes using intermittent manometer control of cuff pressure was superior to standard-cuff endotracheal tubes to prevent postoperative pneumonia in major vascular surgery patients. The higher cuff-pressure variability and higher percentages of time with tapered-cuff overinflation and underinflation represent a potential caveat that deserves further investigation. The impact of continuous cuff-pressure regulation on the ability of tapered cuffs to prevent microaspiration, postoperative pneumonia, and/or VAP needs to be evaluated.

## Acknowledgments

The authors thank Patrice Maboudou, M.D. (Department of Biochemistry and Molecular Biology of the Centre de Biologie Pathologie, Centre Hospitalo-Universitaire de Lille, Lille, France), who did the amylase level measurements in tracheal aspirates.

Dr. Dexheimer was supported by grants from the doctoral fellowship program of the Coordenação de Aperfeiçoamento de Pessoal de Nível Superior (CAPES, Office for the Advancement of Higher Education), Brazilian Ministry of Education, Porto Alegre, Brasil (grant no. BE 6869/13-1). Dr. Wang, a research fellow, was supported by a grant from Peking Union Medical College Hospital, Beijing, China.

## Competing Interests

The authors declare no competing interests.

## Reproducible Science

Full protocol available from Dr. Monsel: antoine.monsel@aphp.fr. Raw data available from Dr. Monsel: antoine.monsel@aphp.fr.

## Correspondence

Address correspondence to Dr. Monsel: Réanimation Polyvalente, Département d'Anesthésie-Réanimation, Groupe Hospitalier Pitié-Salpêtrière, 47-83, Boulevard de l'Hôpital, 75651 Paris Cedex 13, France. antoine.monsel@gmail.com. Information on purchasing reprints may be found at www.anesthesiology.org or on the masthead page at the beginning of this issue. ANESTHESIOLOGY's articles are made freely accessible to all readers, for personal use only, 6 months from the cover date of the issue.

## References

- Shander A, Fleisher LA, Barie PS, Bigatello LM, Sladen RN, Watson CB: Clinical and economic burden of postoperative pulmonary complications: Patient safety summit on definition, risk-reducing interventions, and preventive strategies. *Crit Care Med* 2011; 39:2163-72
- Dupont H, Montravers P, Gauzit R, Veber B, Pouriat JL, Martin C; Club d'Infectiologie en Anesthésie-Réanimation: Outcome of postoperative pneumonia in the Eole study. *Intensive Care Med* 2003; 29:179-88
- Sabaté S, Mazo V, Canet J: Predicting postoperative pulmonary complications: Implications for outcomes and costs. *Curr Opin Anaesthesiol* 2014; 27:201-9
- Dullenkopf A, Gerber A, Weiss M: Fluid leakage past tracheal tube cuffs: Evaluation of the new Microcuff endotracheal tube. *Intensive Care Med* 2003; 29:1849-53
- Dave MH, Frotzler A, Spielmann N, Madjdpour C, Weiss M: Effect of tracheal tube cuff shape on fluid leakage across the cuff: An *in vitro* study. *Br J Anaesth* 2010; 105:538-43
- Madjdpour C, Mauch J, Dave MH, Spielmann N, Weiss M: Comparison of air-sealing characteristics of tapered- vs. cylindrical-shaped high-volume, low-pressure tube cuffs. *Acta Anaesthesiol Scand* 2012; 56:230-5
- Zanella A, Scaravilli V, Isgrò S, Milan M, Cressoni M, Patroniti N, Fumagalli R, Pesenti A: Fluid leakage across tracheal tube cuff, effect of different cuff material, shape, and positive expiratory pressure: A bench-top study. *Intensive Care Med* 2011; 37:343-7
- D'Haese J, De Keukeleire T, Remory I, Van Rompaey K, Umbrain V, Poelaert J: Assessment of intraoperative microaspiration: Does a modified cuff shape improve sealing? *Acta Anaesthesiol Scand* 2013; 57:873-80
- Nseir S, Zerimech F, De Jonckheere J, Alves I, Balduyck M, Durocher A: Impact of polyurethane on variations in tracheal cuff pressure in critically ill patients: A prospective observational study. *Intensive Care Med* 2010; 36:1156-63
- Jaillette E, Zerimech F, De Jonckheere J, Makris D, Balduyck M, Durocher A, Duhamel A, Nseir S: Efficiency of a pneumatic device in controlling cuff pressure of polyurethane-cuffed tracheal tubes: A randomized controlled study. *BMC Anesthesiol* 2013; 13:50
- Bowton DL, Hite RD, Martin RS, Sherertz R: The impact of hospital-wide use of a tapered-cuff endotracheal tube on the incidence of ventilator-associated pneumonia. *Respir Care* 2013; 58:1582-7
- Philippart F, Gaudry S, Quinquis L, Lau N, Ouannes I, Touati S, Nguyen JC, Branger C, Faibis F, Mastouri M, Forceville X, Abroug F, Ricard JD, Grabar S, Misset B; TOP-Cuff Study Group: Randomized intubation with polyurethane or conical cuffs to prevent pneumonia in ventilated patients. *Am J Respir Crit Care Med* 2015; 191:637-45

13. Johanson WG Jr, Pierce AK, Sanford JP, Thomas GD: Nosocomial respiratory infections with gram-negative bacilli. The significance of colonization of the respiratory tract. *Ann Intern Med* 1972; 77:701–6
14. Bouhemad B, Liu ZH, Arbelot C, Zhang M, Ferarri F, Le-Guen M, Girard M, Lu Q, Rouby JJ: Ultrasound assessment of antibiotic-induced pulmonary reabsorption in ventilator-associated pneumonia. *Crit Care Med* 2010; 38:84–92
15. American Thoracic Society; Infectious Diseases Society of America: Guidelines for the management of adults with hospital-acquired, ventilator-associated, and healthcare-associated pneumonia. *Am J Respir Crit Care Med* 2005; 171:388–416
16. Chastre J, Fagon JY: Ventilator-associated pneumonia. *Am J Respir Crit Care Med* 2002; 165:867–903
17. Rouby JJ, Martin De Lassale E, Poete P, Nicolas MH, Bodin L, Jarlier V, Le Charpentier Y, Grosset J, Viars P: Nosocomial bronchopneumonia in the critically ill. Histologic and bacteriologic aspects. *Am Rev Respir Dis* 1992; 146:1059–66
18. Fàbregas N, Ewig S, Torres A, El-Ebiary M, Ramirez J, de La Bellacasa JP, Bauer T, Cabello H: Clinical diagnosis of ventilator associated pneumonia revisited: Comparative validation using immediate post-mortem lung biopsies. *Thorax* 1999; 54:867–73
19. Minei JP, Hawkins K, Moody B, Uchal LB, Joy K, Christensen LL, Haley RW: Alternative case definitions of ventilator-associated pneumonia identify different patients in a surgical intensive care unit. *Shock* 2000; 14:331–6; discussion 336–7
20. Dewavrin F, Zerimech F, Boyer A, Maboudou P, Balduyck M, Duhamel A, Nseir S: Accuracy of  $\alpha$  amylase in diagnosing microaspiration in intubated critically-ill patients. *PLoS One* 2014; 9:e90851
21. Nseir S, Zerimech F, Fournier C, Lubret R, Ramon P, Durocher A, Balduyck M: Continuous control of tracheal cuff pressure and microaspiration of gastric contents in critically ill patients. *Am J Respir Crit Care Med* 2011; 184:1041–7
22. Weiss CH, Moazed F, DiBardino D, Swaroop M, Wunderink RG: Bronchoalveolar lavage amylase is associated with risk factors for aspiration and predicts bacterial pneumonia. *Crit Care Med* 2013; 41:765–73
23. Filloux B, Bedel A, Nseir S, Mathiaux J, Amadéo B, Clouzeau B, Pillot J, Saghi T, Vargas F, Hilbert G, Gruson D, Boyer A: Tracheal amylase dosage as a marker for microaspiration: A pilot study. *Minerva Anesthesiol* 2013; 79:1003–10
24. Futier E, Pereira B, Jaber S: Intraoperative low-tidal-volume ventilation. *N Engl J Med* 2013; 369:1862–3
25. Bo H, He L, Qu J: [Influence of the subglottic secretion drainage on the morbidity of ventilator associated pneumonia in mechanically ventilated patients]. *Zhonghua Jie He He Hu Xi Za Zhi* 2000; 23:472–4
26. Kollef MH, Skubas NJ, Sundt TM: A randomized clinical trial of continuous aspiration of subglottic secretions in cardiac surgery patients. *Chest* 1999; 116:1339–46
27. Lorente L, Lecuona M, Jiménez A, Mora ML, Sierra A: Influence of an endotracheal tube with polyurethane cuff and subglottic secretion drainage on pneumonia. *Am J Respir Crit Care Med* 2007; 176:1079–83
28. Mahul P, Auboyer C, Jospe R, Ros A, Guerin C, el Khouri Z, Galliez M, Dumont A, Gaudin O: Prevention of nosocomial pneumonia in intubated patients: Respective role of mechanical subglottic secretions drainage and stress ulcer prophylaxis. *Intensive Care Med* 1992; 18:20–5
29. Smulders K, van der Hoeven H, Weers-Pothoff I, Vandenbroucke-Grauls C: A randomized clinical trial of intermittent subglottic secretion drainage in patients receiving mechanical ventilation. *Chest* 2002; 121:858–62
30. Vallés J, Artigas A, Rello J, Bonsoms N, Fontanals D, Blanch L, Fernández R, Baigorri F, Mestre J: Continuous aspiration of subglottic secretions in preventing ventilator-associated pneumonia. *Ann Intern Med* 1995; 122:179–86
31. Montravers P, Veber B, Auboyer C, Dupont H, Gauzit R, Korinek AM, Malledant Y, Martin C, Moine P, Pourriat JL: Diagnostic and therapeutic management of nosocomial pneumonia in surgical patients: Results of the Eole study. *Crit Care Med* 2002; 30:368–75
32. Hortal J, Giannella M, Pérez MJ, Barrio JM, Desco M, Bouza E, Muñoz P: Incidence and risk factors for ventilator-associated pneumonia after major heart surgery. *Intensive Care Med* 2009; 35:1518–25
33. Fagon JY, Chastre J, Domart Y, Trouillet JL, Pierre J, Darne C, Gibert C: Nosocomial pneumonia in patients receiving continuous mechanical ventilation. Prospective analysis of 52 episodes with use of a protected specimen brush and quantitative culture techniques. *Am Rev Respir Dis* 1989; 139:877–84
34. Hortal J, Muñoz P, Cuerpo G, Litvan H, Rosseel PM, Bouza E; European Study Group on Nosocomial Infections; European Workgroup of Cardiothoracic Intensivists: Ventilator-associated pneumonia in patients undergoing major heart surgery: An incidence study in Europe. *Crit Care* 2009; 13:R80
35. Kollef MH, Vlasnik J, Sharpless L, Pasque C, Murphy D, Fraser V: Scheduled change of antibiotic classes: A strategy to decrease the incidence of ventilator-associated pneumonia. *Am J Respir Crit Care Med* 1997; 156(4 Pt 1):1040–8
36. Sirvent JM, Torres A, El-Ebiary M, Castro P, de Batlle J, Bonet A: Protective effect of intravenously administered cefuroxime against nosocomial pneumonia in patients with structural coma. *Am J Respir Crit Care Med* 1997; 155:1729–34
37. Amour J, Birenbaum A, Langeron O, Le Manach Y, Bertrand M, Coriat P, Riou B, Bernard M, Hausfater P: Influence of renal dysfunction on the accuracy of procalcitonin for the diagnosis of postoperative infection after vascular surgery. *Crit Care Med* 2008; 36:1147–54
38. Li Bassi G, Ranzani OT, Marti JD, Giunta V, Luque N, Isetta V, Ferrer M, Farre R, Pimentel GL, Torres A: An *in vitro* study to assess determinant features associated with fluid sealing in the design of endotracheal tube cuffs and exerted tracheal pressures. *Crit Care Med* 2013; 41:518–26
39. Touat L, Fournier C, Ramon P, Salleron J, Durocher A, Nseir S: Intubation-related tracheal ischemic lesions: Incidence, risk factors, and outcome. *Intensive Care Med* 2013; 39:575–82
40. Karasawa F, Okuda T, Mori T, Oshima T: Maintenance of stable cuff pressure in the Brandt tracheal tube during anaesthesia with nitrous oxide. *Br J Anaesth* 2002; 89:271–6
41. Karasawa F, Hamachi T, Takamatsu I, Oshima T: Time required to achieve a stable cuff pressure by repeated aspiration of the cuff during anaesthesia with nitrous oxide. *Eur J Anaesthesiol* 2003; 20:470–4
42. Karasawa F, Takita A, Mori T, Takamatsu I, Kawatani Y, Oshima T: The Brandt tube system attenuates the cuff deflationary phenomenon after anaesthesia with nitrous oxide. *Anesth Analg* 2003; 96:606–10
43. Abdelatti MO: A cuff pressure controller for tracheal tubes and laryngeal mask airways. *Anaesthesia* 1999; 54:981–6
44. Smith RP, McArdle BH: Pressure in the cuffs of tracheal tubes at altitude. *Anaesthesia* 2002; 57:374–8
45. Lucangelo U, Zin WA, Antonaglia V, Petrucci L, Viviani M, Buscema G, Borelli M, Berlot G: Effect of positive expiratory pressure and type of tracheal cuff on the incidence of aspiration in mechanically ventilated patients in an intensive care unit. *Crit Care Med* 2008; 36:409–13
46. Valencia M, Ferrer M, Farre R, Navajas D, Badia JR, Nicolas JM, Torres A: Automatic control of tracheal tube cuff pressure in ventilated patients in semirecumbent position: A randomized trial. *Crit Care Med* 2007; 35:1543–9
47. Lorente L, Lecuona M, Jiménez A, Lorenzo L, Roca I, Cabrera J, Llanos C, Mora ML: Continuous endotracheal tube cuff

pressure control system protects against ventilator-associated pneumonia. *Crit Care* 2014; 18:R77

48. Rouzé A, Jaillette E, Nseir S: Continuous control of tracheal cuff pressure: An effective measure to prevent ventilator-associated pneumonia? *Crit Care* 2014; 18:512
49. Weiss M, Doell C, Koepfer N, Madjdpour C, Woitzek K, Bernet V: Rapid pressure compensation by automated cuff pressure controllers worsens sealing in tracheal tubes. *Br J Anaesth* 2009; 102:273–8

## Appendix

Members of the Tapered Endotracheal Tube to prevent Respiratory Infections (TETRIS) Study Group:

The TETRIS study group members are authors of this article and the following investigators: Liliane Bodin, M.D., Romain Deransy, M.D., M.Sc., Pierre Garçon, M.D., Hatem Douiri, M.D., Ismael Khalifa, M.D., Antoine Pons, M.D. (Multidisciplinary Intensive Care Unit, Department of Anesthesiology and Critical Care, La Pitié-Salpêtrière Hospital, Assistance Publique–Hôpitaux de Paris, Paris, France); Wen-Jie Gu, Ph.D. (Clinical Research Department, La Pitié-Salpêtrière Hospital, Assistance Publique–Hôpitaux de Paris, Paris, France); Fabien Koskas, M.D., Ph.D., Julien Gaudric, M.D. (Department of Vascular Surgery, La Pitié-Salpêtrière Hospital, Assistance Publique–Hôpitaux de Paris, Paris, France).

## ANESTHESIOLOGY REFLECTIONS FROM THE WOOD LIBRARY-MUSEUM

### Peale's Central Figures in *The Court of Death*: Death, the Corpse, Old Age, and Faith

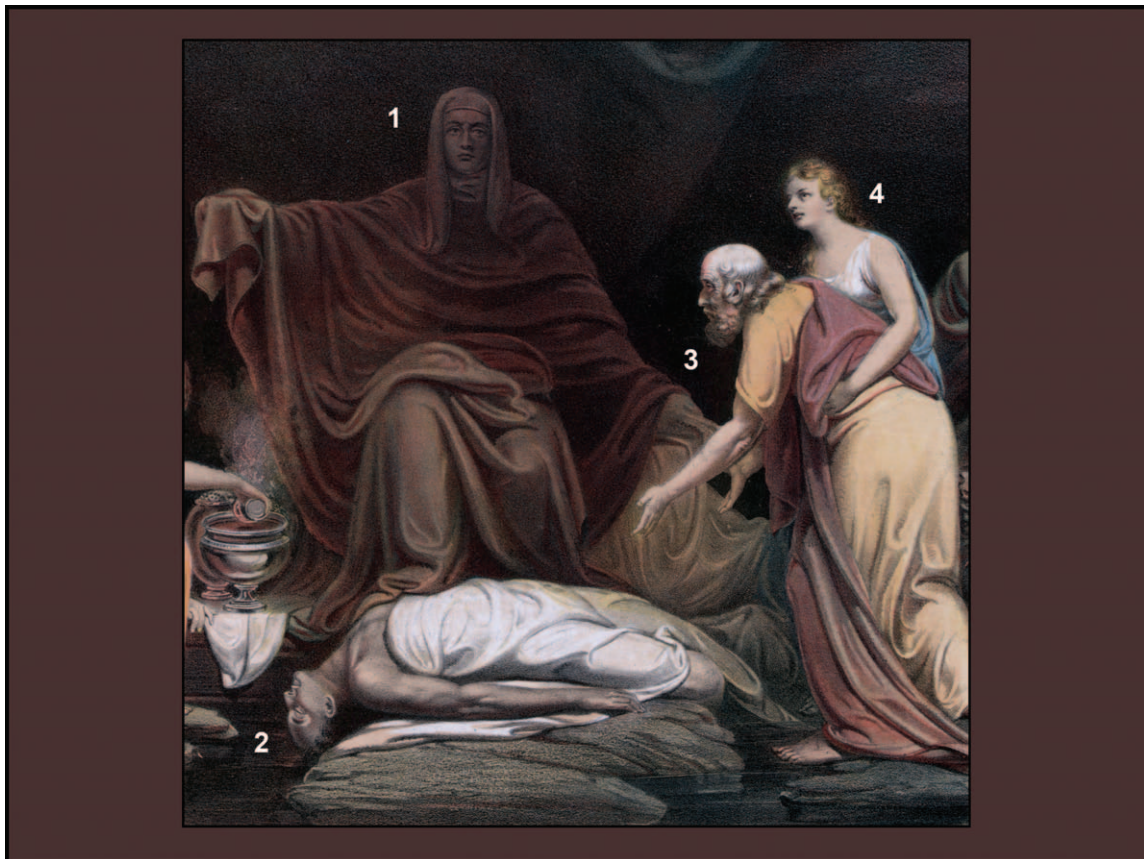

Raised in a Vermont family of church deacons and clergymen, nitrous oxide pioneer Gardner Q. Colton (1814–1898) so relished selling tickets for showings of *The Court of Death* that in 1858 he bought that allegorical oil painting from its American painter, Rembrandt Peale (1778–1860). In a central close-up (*above*) of the chromolithograph that Colton mass-produced for sale, pharaoh-like Death (1) passes judgment over the youthful Corpse (2), on whose chest rests the right foot of Death. Approaching Death is the figure—uniting supposed features of the bard Homer with the body of Peale's father—of Old Age (3), who, supported by Faith (4), can triumph over Death. Over a rocky surface, Peale arches the Corpse (modeled after an actual cadaver and after Peale's brother) with "oblivion's listless stream" washing over its head and feet to show that, "We know not whence man cometh, nor whither he goeth." In 1863, less than 4 years after first selling copies of Peale's masterwork, Colton would found his namesake dental association for using unoxxygenated nitrous oxide anesthetics to "wash away" patients' experiences or memories of dental extraction. (Copyright © the American Society of Anesthesiologists, Inc.)

George S. Bause, M.D., M.P.H., Honorary Curator, ASA's Wood Library-Museum of Anesthesiology, Schaumburg, Illinois, and Clinical Associate Professor, Case Western Reserve University, Cleveland, Ohio. UJYC@aol.com.
